# Supplementary material for: A Randomized Controlled Trial of Executive Functioning Training Compared With Perceptual Training for Schizophrenia Spectrum Disorders: Effects on Neurophysiology, Neurocognition, and Functioning
Source: Atypon-hosted journal article supplement (doi:10.1176/appi.ajp.2018.18070849), 2019-03-08
Supplement: appi.ajp.2018.18070849.ds001.pdf [file appi.ajp.2018.18070849.ds001.pdf]

 


Psychiatry Online
